# Supplementary material
Source: PubMed Central journal article supplement (PMC7206135)
Supplement: 42003_2020_954_MOESM1_ESM.pdf [file 42003_2020_954_MOESM1_ESM.pdf]

**Supplementary information for**

**Adaptive laboratory evolution enhances methanol tolerance and  
conversion in engineered *Corynebacterium glutamicum***

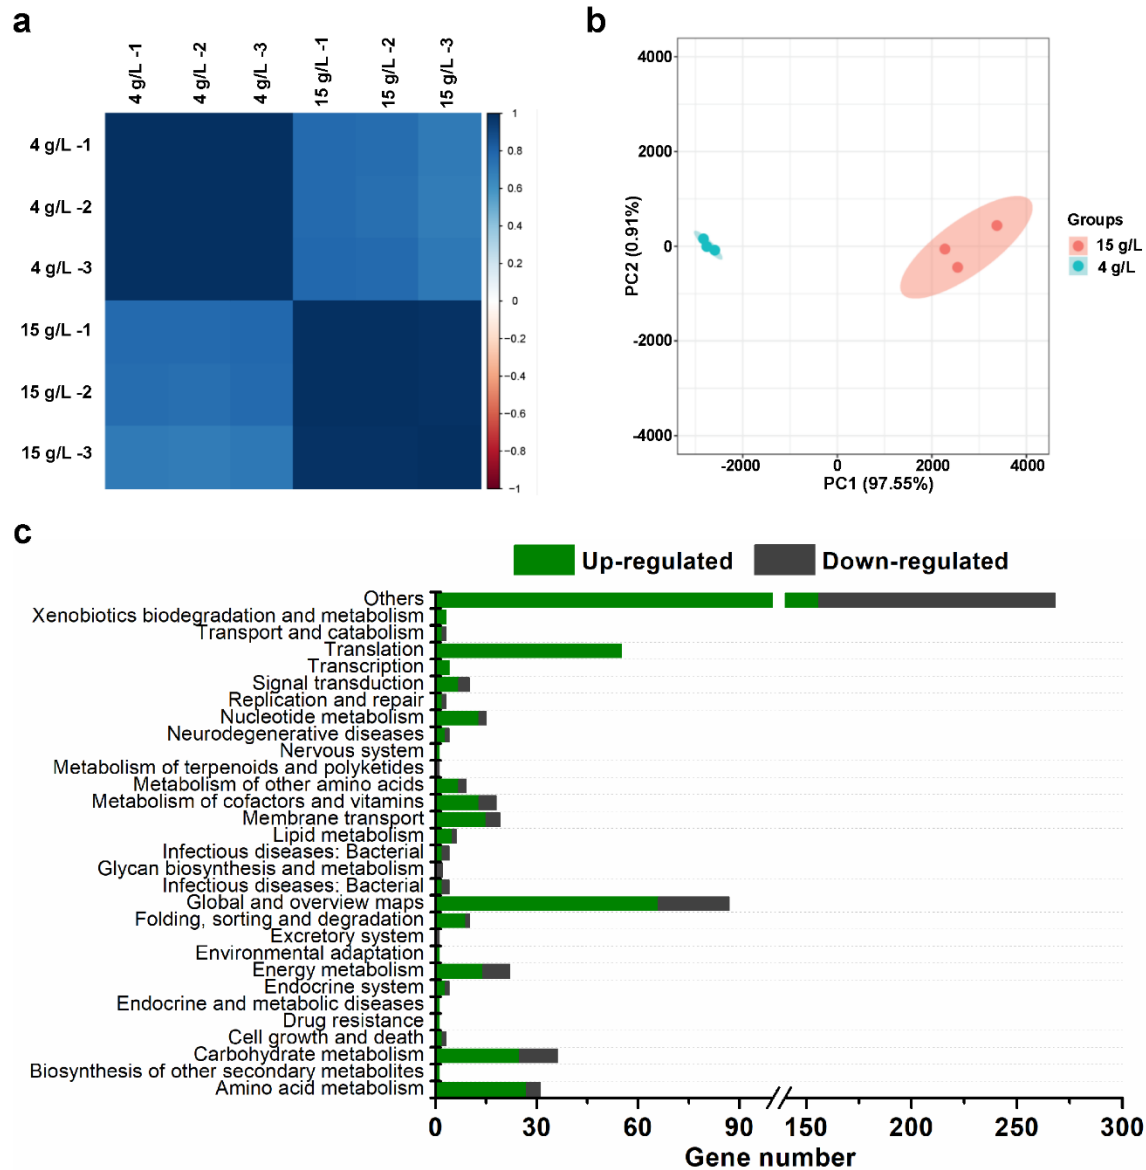

**Supplementary Fig. 1** Evaluation of the accuracy and repeatability of transcriptome analysis and classification of differentially expressed genes. **a**, Pearson's correlation coefficient test. **b**, Principle component analysis (PCA). **c**, Classification of differentially expressed genes according to KEGG\_B\_class annotation.

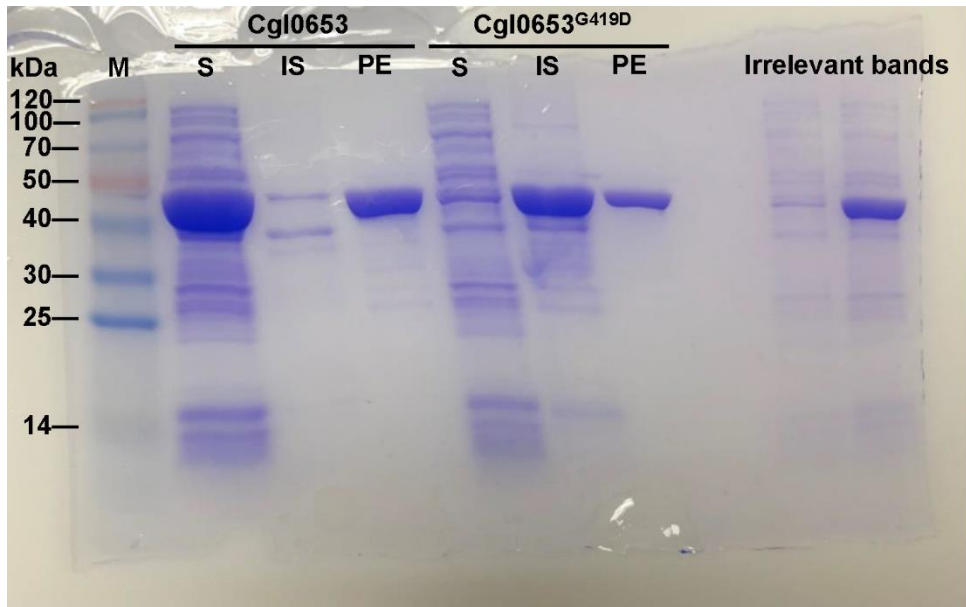

**Supplementary Fig. 2** The uncropped gel image of that shown in Fig. 5b. S, Soluble supernatant of cell extract; IS, insoluble sediment; PE, purified enzyme.

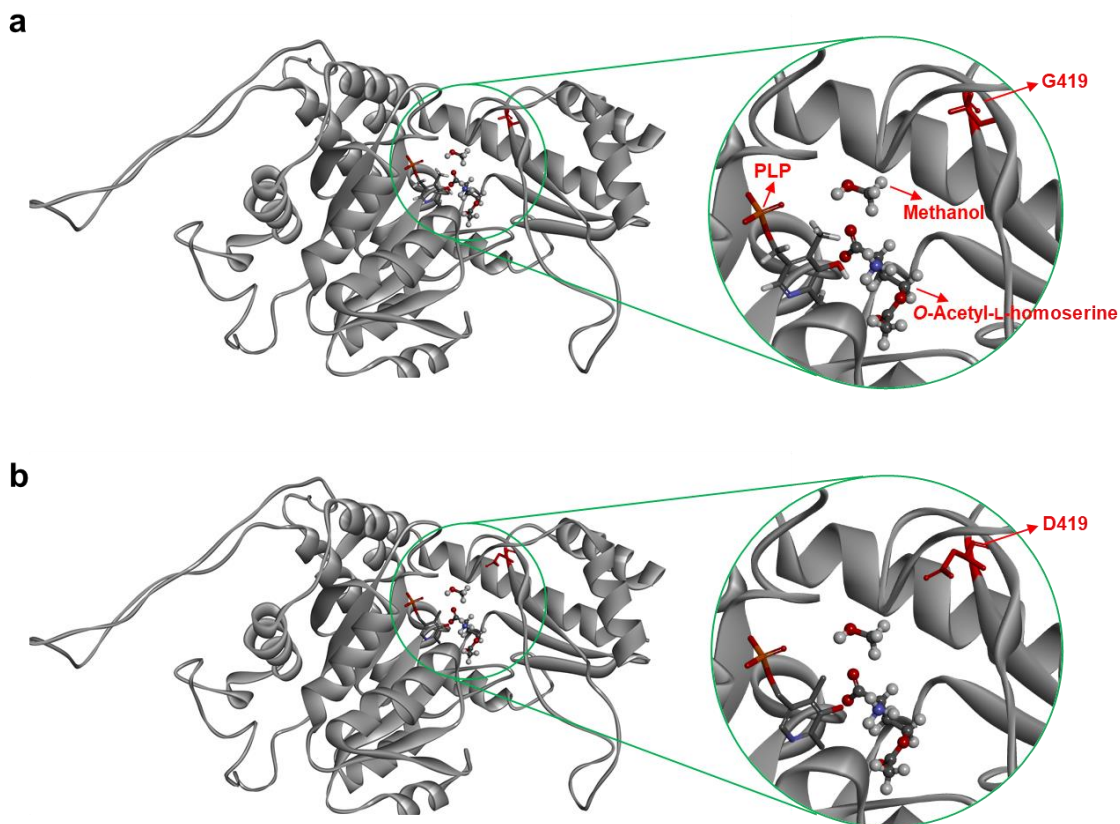

**Supplementary Fig. 3** Mapping G419D mutation in Cgl0653 (MetY). The model structure of the wild-type Cgl0653 was constructed with the crystal structure of *O*-acetyl-L-homoserine sulfhydrylase from *Mycobacterium marinum* ATCC BAA-535 (PDB ID: 4KAM) as a template (54% sequence identity with Cgl0653) using Discovery Studio 4.1 software (Biovia). Flexible dockings of pyridoxal-5-phosphate (PLP), methanol and *O*-acetyl-L-homoserine into the active site were performed with Discovery Studio 4.1 software (Biovia). **a**, Wild-type Cgl0653. **b**, Cgl0653<sup>G419D</sup>.

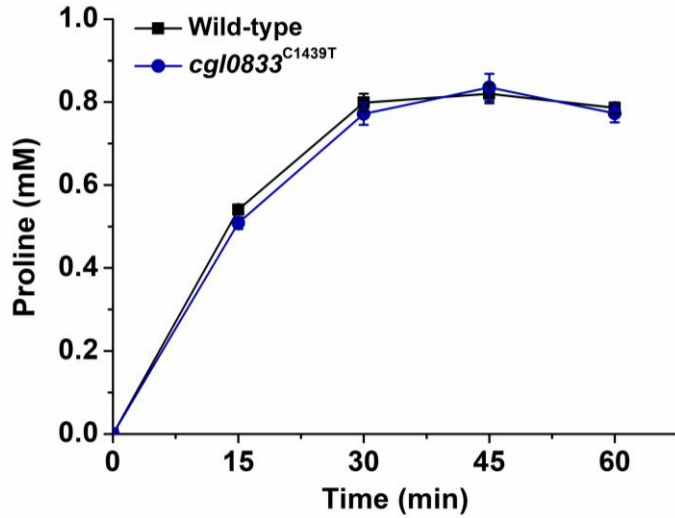

**Supplementary Fig. 4** Proline transport by *C. glutamicum* ATCC 13032 wild-type strain and *cgl0833*<sup>C1439T</sup> mutant strain. Pregrown cells were harvested and washed twice with ice-cold CGXII medium. The peptide uptake and amino acid excretion were then initiated by resuspending the cells in prewarmed CGXII medium (30°C) containing 2 mM Phe-Pro. The resulting cell density (OD<sub>600nm</sub>) was 10.0. The cells were incubated at 30°C and with shaking at 220 rpm. Samples were taken every 15 min, and extracellular amino acids were quantified using HPLC. Error bars indicate standard deviations from three parallel experiments.

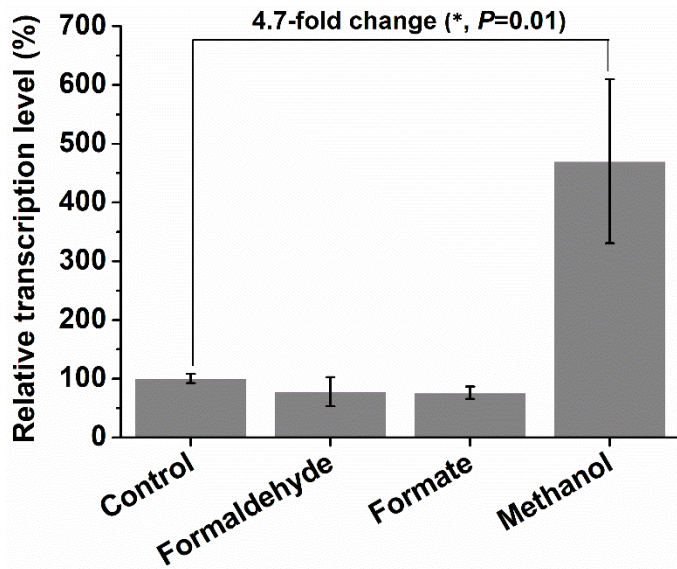

**Supplementary Fig. 5** Relative transcription level of *cgl0833* in *C. glutamicum* ATCC 13032 under treatment with methanol (5 g/L), formaldehyde (15 mg/L), or formate (5 g/L). Error bars indicate standard deviations from three parallel experiments. \* $P < 0.05$ , one-way ANOVA,  $N = 3$ .

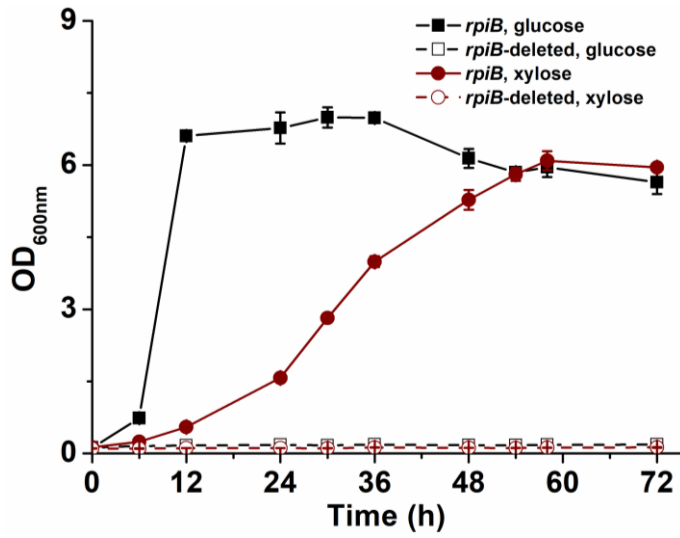

**Supplementary Fig. 6** Effects of *rpiB* deletion on cell growth on xylose and glucose. *C. glutamicum* strains were cultivated using CGXII minimal medium supplemented with 4 g/L glucose or 4 g/L xylose as the carbon source. Error bars indicate standard deviations from three parallel experiments.

**Supplementary Data 1** Gene transcript level changes between *C. glutamicum* strain MX-14 cultivated with 15 g/L vs. 4 g/L methanol

Supplementary Data 1 is provided separately as an excel document.



**Supplementary Table 1** *In silico* analysis of *rpiB* deletion on cell growth with different carbon sources<sup>a</sup>

| <b>Carbon source<sup>b</sup></b> | <b>Cell growth (h<sup>-1</sup>)</b> |
|----------------------------------|-------------------------------------|
| Xylose                           | 0                                   |
| Glucose                          | 0                                   |
| Methanol and xylose              | 0.081                               |
| Methanol and glucose             | 0.116                               |

<sup>a</sup>The reaction catalyzed by RpiB (R5P  $\rightleftharpoons$  Ru5P) was deleted from the genome-scale metabolic model of *C. glutamicum* ATCC13032, *iCW773*<sup>1</sup>.

<sup>b</sup>Uptake rate of each carbon source was set as 1 mmol/gCDW·h.

**Supplementary Table 2** Strains and plasmids used in this study

| Strain or plasmid                                 | Description <sup>a</sup>                                                                                                                                          | Reference or source |
|---------------------------------------------------|-------------------------------------------------------------------------------------------------------------------------------------------------------------------|---------------------|
| <b>Strain</b>                                     |                                                                                                                                                                   |                     |
| <i>E. coli</i>                                    |                                                                                                                                                                   |                     |
| DH5α                                              | General cloning host                                                                                                                                              | TaKaRa              |
| BL21 (DE3)                                        | Gene overexpression host                                                                                                                                          | Novagen             |
| BL21 (pET-28a- <i>metX</i> )                      | Derivative of BL21 (DE3) harboring pET-28a- <i>metX</i> for heterogeneous expression of <i>metX</i> from <i>Leptospira meyeri</i> fused with a N-terminal His-Tag | Lab stock           |
| BL21 (pET-21a- <i>cgl0653</i> )                   | Derivative of BL21 (DE3) harboring pET-21a- <i>cgl0653</i>                                                                                                        | This study          |
| BL21 (pET-21a- <i>cgl0653</i> <sup>G1256A</sup> ) | Derivative of BL21 (DE3) harboring pET-21a- <i>cgl0653</i> <sup>G1256A</sup>                                                                                      | This study          |
| <i>C. glutamicum</i>                              |                                                                                                                                                                   |                     |
| ATCC 13032                                        | Wild-type strain                                                                                                                                                  | Lab stock           |
| MX-4                                              | Mutant of strain MX-3 that grows fast using ribose and xylose as carbon sources                                                                                   | 2                   |
| MX-10                                             | Derivative of strain MX-4 harboring pEC-XK99E- <i>mdh</i> <sub>Bs2334</sub> - <i>hps-phi</i> <sub>Bm</sub>                                                        | 2                   |
| MX-11                                             | Mutant of strain MX-10 that grows fast using methanol and xylose as carbon sources                                                                                | This study          |
| MX-12                                             | Mutant of strain MX-11 that grows fast using xylose and high concentrations of methanol as carbon sources                                                         | This study          |
| MX-13                                             | Mutant of strain MX-11 that grows fast using xylose and high concentrations of methanol as carbon sources                                                         | This study          |
| MX-14                                             | Mutant of strain MX-11 that grows fast using xylose and high concentrations of methanol as carbon sources                                                         | This study          |
| MX-10- <i>cgl0653</i> <sup>G1256A</sup>           | Derivative of strain MX-10 harboring <i>cgl0653</i> <sup>G1256A</sup> mutation                                                                                    | This study          |
| MX-10- <i>cgl0754</i> <sup>C582A</sup>            | Derivative of strain MX-10 harboring <i>cgl0754</i> <sup>C582A</sup> mutation                                                                                     | This study          |
| MX-10- <i>cgl1367</i> <sup>C584T</sup>            | Derivative of strain MX-10 harboring <i>cgl1367</i> <sup>C584T</sup> mutation                                                                                     | This study          |
| MX-10- <i>cgl1520</i> <sup>A574G</sup>            | Derivative of strain MX-10 harboring <i>cgl1520</i> <sup>A574G</sup> mutation                                                                                     | This study          |
| MX-10- <i>cgl2998</i> <sup>G104T</sup>            | Derivative of strain MX-10 harboring <i>cgl2998</i> <sup>G104T</sup> mutation                                                                                     | This study          |
| MX-10- <i>cgl2365</i> <sup>C542G</sup>            | Derivative of strain MX-10 harboring <i>cgl2365</i> <sup>C542G</sup> mutation                                                                                     | This study          |

|                                                      |                                                                                                                        |            |
|------------------------------------------------------|------------------------------------------------------------------------------------------------------------------------|------------|
| MX-10- <i>cgl2857</i> <sup>G183A</sup>               | Derivative of strain MX-10 harboring <i>cgl2857</i> <sup>G183A</sup> mutation                                          | This study |
| MX-10- <i>cgl0833</i> <sup>C1439T</sup>              | Derivative of strain MX-10 harboring <i>cgl0833</i> <sup>C1439T</sup> mutation                                         | This study |
| 13032- <i>cgl0653</i> <sup>G1256A</sup>              | Derivative of strain ATCC 13032 harboring <i>cgl0653</i> <sup>G1256A</sup> mutation                                    | This study |
| 13032- <i>cgl0754</i> <sup>C582A</sup>               | Derivative of strain ATCC 13032 harboring <i>cgl0754</i> <sup>C582A</sup> mutation                                     | This study |
| 13032- <i>cgl1367</i> <sup>C584T</sup>               | Derivative of strain ATCC 13032 harboring <i>cgl1367</i> <sup>C584T</sup> mutation                                     | This study |
| 13032- <i>cgl1520</i> <sup>A574G</sup>               | Derivative of strain ATCC 13032 harboring <i>cgl1520</i> <sup>A574G</sup> mutation                                     | This study |
| 13032- <i>cgl2998</i> <sup>G104T</sup>               | Derivative of strain ATCC 13032 harboring <i>cgl2998</i> <sup>G104T</sup> mutation                                     | This study |
| 13032- <i>cgl2365</i> <sup>C542G</sup>               | Derivative of strain ATCC 13032 harboring <i>cgl2365</i> <sup>C542G</sup> mutation                                     | This study |
| 13032- <i>cgl2857</i> <sup>G183A</sup>               | Derivative of strain ATCC 13032 harboring <i>cgl2857</i> <sup>G183A</sup> mutation                                     | This study |
| 13032- <i>cgl0833</i> <sup>C1439T</sup>              | Derivative of strain ATCC 13032 harboring <i>cgl0833</i> <sup>C1439T</sup> mutation                                    | This study |
| 13032- <i>cgl0833-gfp</i>                            | Derivative of strain ATCC 13032 with <i>gfp</i> fused to <i>cgl0833</i>                                                | This study |
| 13032- <i>cgl0833</i> <sup>C1439T</sup> - <i>gfp</i> | Derivative of strain 13032- <i>cgl0833</i> <sup>C1439T</sup> with <i>gfp</i> fused to <i>cgl0833</i> <sup>C1439T</sup> | This study |
| 13032 (pdCas9-gRNA- <i>cgl0653</i> )                 | Derivative of strain ATCC 13032 harboring pdCas9-gRNA- <i>cgl0653</i>                                                  | This study |
| 13032 (pdCas9-gRNA- <i>cgl0833</i> )                 | Derivative of strain ATCC 13032 harboring pdCas9-gRNA- <i>cgl0833</i>                                                  | This study |
| 13032 (pEC-XK99E- <i>cgl0653</i> )                   | Derivative of strain ATCC 13032 harboring pEC-XK99E- <i>cgl0653</i>                                                    | This study |
| 13032 (pEC-XK99E- <i>cgl0653</i> <sup>G1256A</sup> ) | Derivative of strain ATCC 13032 harboring pEC-XK99E- <i>cgl0653</i> <sup>G1256A</sup>                                  | This study |
| 13032 (pEC-XK99E- <i>cgl0833</i> )                   | Derivative of strain ATCC 13032 harboring pEC-XK99E- <i>cgl0833</i>                                                    | This study |
| 13032 (pEC-XK99E- <i>cgl0833</i> <sup>C1439T</sup> ) | Derivative of strain ATCC 13032 harboring pEC-XK99E- <i>cgl0833</i> <sup>C1439T</sup>                                  | This study |
| 13032Δ <i>cgl0653</i>                                | Derivative of strain ATCC 13032 with <i>cgl0653</i> knocked out                                                        | This study |
| 13032Δ <i>cgl0833</i>                                | Derivative of strain ATCC 13032 with <i>cgl0833</i> knocked out                                                        | This study |
| <b>Plasmid</b>                                       |                                                                                                                        |            |
| pET-21a(+)                                           | Overexpression vector, C-terminal His-Tag, Amp <sup>R</sup>                                                            | Novagen    |
| pK18 <i>mobsacB</i>                                  | Suicide vector for genome editing in <i>C. glutamicum</i> , <i>mob</i> , <i>sacB</i> , Km <sup>R</sup>                 | 3          |

|                                                                        |                                                                                                                                                                                                                                                  |            |
|------------------------------------------------------------------------|--------------------------------------------------------------------------------------------------------------------------------------------------------------------------------------------------------------------------------------------------|------------|
| pEC-XK99E                                                              | Expression vector, IPTG-inducible promoter $P_{trc}$ , Km <sup>R</sup>                                                                                                                                                                           | 4          |
| pdCas9                                                                 | pXMJ19 carrying dCas9 cassette driven by IPTG-inducible promoter $P_{tac}$ for gene knock-down, Cm <sup>R</sup>                                                                                                                                  | 5          |
| pnCas9(D10A)-AID-gRNA- <i>ccdB</i> <sup>TS</sup>                       | All-in-one plasmid for base editing in <i>C. glutamicum</i>                                                                                                                                                                                      | 6          |
| pEC-XK99E- <i>mdh</i> <sub>Bs2334</sub> - <i>hps-phi</i> <sub>Bm</sub> | pEC-XK99E harboring <i>mdh</i> gene from <i>Bacillus stearothermophilus</i> DSM 2334, under the control of $P_{trc}$ , and <i>hps</i> and <i>phi</i> genes from <i>B. methanolicus</i> MGA3, under the control of constitutive promoter $P_{P5}$ | 2          |
| pK18- <i>cgl0653</i> <sup>G1256A</sup>                                 | pK18 <i>mobsacB</i> derivative for introducing <i>cgl0653</i> <sup>G1256A</sup> mutation                                                                                                                                                         | This study |
| pK18- <i>cgl0754</i> <sup>C582A</sup>                                  | pK18 <i>mobsacB</i> derivative for introducing <i>cgl0754</i> <sup>C582A</sup> mutation                                                                                                                                                          | This study |
| pK18- <i>cgl1367</i> <sup>C584T</sup>                                  | pK18 <i>mobsacB</i> derivative for introducing <i>cgl1367</i> <sup>C584T</sup> mutation                                                                                                                                                          | This study |
| pK18- <i>cgl1520</i> <sup>A574G</sup>                                  | pK18 <i>mobsacB</i> derivative for introducing <i>cgl1520</i> <sup>A574G</sup> mutation                                                                                                                                                          | This study |
| pK18- <i>cgl2998</i> <sup>G104T</sup>                                  | pK18 <i>mobsacB</i> derivative for introducing <i>cgl2998</i> <sup>G104T</sup> mutation                                                                                                                                                          | This study |
| pK18- <i>cgl2365</i> <sup>C542G</sup>                                  | pK18 <i>mobsacB</i> derivative for introducing <i>cgl2365</i> <sup>C542G</sup> mutation                                                                                                                                                          | This study |
| pK18- <i>cgl2857</i> <sup>G183A</sup>                                  | pK18 <i>mobsacB</i> derivative for introducing <i>cgl2857</i> <sup>G183A</sup> mutation                                                                                                                                                          | This study |
| pK18- <i>cgl0833</i> <sup>C1439T</sup>                                 | pK18 <i>mobsacB</i> derivative for introducing <i>cgl0833</i> <sup>C1439T</sup> mutation                                                                                                                                                         | This study |
| pdCas9-gRNA- <i>ccdB</i>                                               | All-in-one plasmid for CRISPRi, pdCas9 derivative with gRNA- <i>ccdB</i> cassette from pgRNA- <i>ccdB</i>                                                                                                                                        | This study |
| pdCas9-gRNA- <i>cgl0653</i>                                            | pdCas9-gRNA- <i>ccdB</i> derivative harboring gRNA targeting <i>cgl0653</i> for knock-down                                                                                                                                                       | This study |
| pdCas9-gRNA- <i>cgl0833</i>                                            | pdCas9-gRNA- <i>ccdB</i> derivative harboring gRNA targeting <i>cgl0833</i> for knock-down                                                                                                                                                       | This study |
| pEC-XK99E- <i>cgl0653</i>                                              | pEC-XK99E derivative harboring wild-type <i>cgl0653</i> for overexpression                                                                                                                                                                       | This study |
| pEC-XK99E- <i>cgl0653</i> <sup>G1256A</sup>                            | pEC-XK99E derivative harboring <i>cgl0653</i> <sup>G1256A</sup> mutant for overexpression                                                                                                                                                        | This study |
| pEC-XK99E- <i>cgl0833</i>                                              | pEC-XK99E derivative harboring wild-type <i>cgl0833</i> for overexpression                                                                                                                                                                       | This study |
| pEC-XK99E- <i>cgl0833</i> <sup>C1439T</sup>                            | pEC-XK99E derivative harboring <i>cgl0833</i> <sup>C1439T</sup> mutant for overexpression                                                                                                                                                        | This study |
| pK18- <i>cgl0833-gfp</i>                                               | pK18 <i>mobsacB</i> derivative harboring homologous arms and <i>gfp</i> for fusing <i>gfp</i> with <i>cgl0833</i>                                                                                                                                | This study |

|                                                     |                                                                                                                                     |            |
|-----------------------------------------------------|-------------------------------------------------------------------------------------------------------------------------------------|------------|
| pK18- <i>cgl0833</i> <sup>C1439T</sup> - <i>gfp</i> | pK18 <i>mobsacB</i> derivative harboring homologous arms and <i>gfp</i> for fusing <i>gfp</i> with <i>cgl0833</i> <sup>C1439T</sup> | This study |
| pET-21a- <i>cgl0653</i>                             | pET-21a(+) derivative harboring <i>cgl0653</i> fused with a C-terminal His·Tag                                                      | This study |
| pET-21a- <i>cgl0653</i> <sup>G1256A</sup>           | pET-21a(+) derivative harboring <i>cgl0653</i> <sup>G1256A</sup> fused with a C-terminal His·Tag                                    | This study |
| pK18- $\Delta$ <i>cgl0653</i>                       | pK18 <i>mobsacB</i> derivative harboring homologous arms for <i>cgl0653</i> knock-out                                               | This study |
| pK18- $\Delta$ <i>cgl0833</i>                       | pK18 <i>mobsacB</i> derivative harboring homologous arms for <i>cgl0833</i> knock-out                                               | This study |

---

<sup>a</sup>Amp<sup>R</sup>, Km<sup>R</sup> and Cm<sup>R</sup> represent resistance to ampicillin, kanamycin, and chloramphenicol, respectively.

**Supplementary Table 3** Primers used in this study

| <b>Primer</b>                            | <b>Sequence (5'-3')</b>                             | <b>Relevance</b>                          |
|------------------------------------------|-----------------------------------------------------|-------------------------------------------|
| <i>cgl0653</i> <sup>G1256A</sup> -F      | TATGACATGATTACGAATTCACGCTGTAG<br>CGTTCTCCTC         | pK18-<br><i>cgl0653</i> <sup>G1256A</sup> |
| <i>cgl0653</i> <sup>G1256A</sup> -R      | CGACGGCCAGTGCCAAGCTTGCTGTACTA<br>GCTTGTCTGCTTGGTAG  |                                           |
| <i>cgl0754</i> <sup>C582A</sup> -F       | TATGACATGATTACGAATTCTTGATGACTT<br>AAATGCGCCCGGC     | pK18-<br><i>cgl0754</i> <sup>C582A</sup>  |
| <i>cgl0754</i> <sup>C582A</sup> -R       | CGACGGCCAGTGCCAAGCTTGCGGTGTGC<br>GCAATTCGTG         |                                           |
| <i>cgl1367</i> <sup>C584T</sup> -F       | TATGACATGATTACGAATTCCTCGGTATTCC<br>ATCTTCAGTTGTACTG | pK18-<br><i>cgl1367</i> <sup>C584T</sup>  |
| <i>cgl1367</i> <sup>C584T</sup> -R       | CGACGGCCAGTGCCAAGCTTGACCAGCA<br>ATGGATCGGCAC        |                                           |
| <i>cgl1520</i> <sup>A574G</sup> -F       | TATGACATGATTACGAATTCACCTTGTCC<br>GCCACAGC           | pK18-<br><i>cgl1520</i> <sup>A574G</sup>  |
| <i>cgl1520</i> <sup>A574G</sup> -R       | CGACGGCCAGTGCCAAGCTTACCATGATC<br>CGCTAACAACCGC      |                                           |
| <i>cgl2998</i> <sup>G104T</sup> -F       | TATGACATGATTACGAATTCGTTGACCTTG<br>TTCGTGGCTATGC     | pK18-<br><i>cgl2998</i> <sup>G104T</sup>  |
| <i>cgl2998</i> <sup>G104T</sup> -R       | CGACGGCCAGTGCCAAGCTTGCGGAGCAT<br>CCGAGAAGTTC        |                                           |
| <i>cgl2365</i> <sup>C542G</sup> -F       | TATGACATGATTACGAATTCAGCTGGGGC<br>AGCGTTGAG          | pK18-<br><i>cgl2365</i> <sup>C542G</sup>  |
| <i>cgl2365</i> <sup>C542G</sup> -R       | CGACGGCCAGTGCCAAGCTTACGGACGG<br>TTGGAACATTTGCG      |                                           |
| <i>cgl2857</i> <sup>G183A</sup> -F       | TATGACATGATTACGAATTCTGCCGAGCGT<br>TTTCATCCAACCTG    | pK18-<br><i>cgl2857</i> <sup>G183A</sup>  |
| <i>cgl2857</i> <sup>G183A</sup> -R       | CGACGGCCAGTGCCAAGCTTCGGCCAAA<br>AACTTGGAAGGCC       |                                           |
| <i>cgl0833</i> <sup>C1439T</sup> -F      | TATGACATGATTACGAATTCTACTTGATCG<br>CTCAGATGGCTGG     | pK18-<br><i>cgl0833</i> <sup>C1439T</sup> |
| <i>cgl0833</i> <sup>C1439T</sup> -R      | CGACGGCCAGTGCCAAGCTTAGAGGAGT<br>GCAGCATGAGATCATC    |                                           |
| dCas9-F                                  | AAACAGAATTAATTAAGCTTAAAGGAGTT<br>G                  | pdCas9-gRNA-<br><i>ccdB</i>               |
| dCas9-R                                  | CCTCTAGAGTCGACCTGCAG                                |                                           |
| CRISPRi <sub><i>cgl0653</i></sub> -F     | TTCAAAGCCCCACTGGTCAGCAT                             | pdCas9-gRNA-<br><i>cgl0653</i>            |
| CRISPRi <sub><i>cgl0653</i></sub> -<br>R | AAACATGCTGACCAGTGGGGCTTT                            |                                           |
| CRISPRi <sub><i>cgl0833</i></sub> -F     | TTCACAGAAACAGCGTCTTGTGCA                            | pdCas9-gRNA-<br><i>cgl0833</i>            |
| CRISPRi <sub><i>cgl0833</i></sub> -<br>R | AAACTGCACAAGACGCTGTTTCTG                            |                                           |

|                             |                                                     |                                                  |
|-----------------------------|-----------------------------------------------------|--------------------------------------------------|
| <i>cgl0653</i> -F           | ACAGGCCAAAGGAGTTGAGAATGCCAAA<br>GTACGACAATTCCA      | pEC-XK99E-<br><i>cgl0653</i> and                 |
| <i>cgl0653</i> -R           | CCAAGCTTGCATGCCTGCAGCTAGATTGC<br>AGCAAAGCCGC        | pEC-XK99E-<br><i>cgl0653</i> <sup>G1256A</sup>   |
| <i>cgl0833</i> -F           | ACAGGCCAAAGGAGTTGAGAATGAATTCC<br>ACTATTCTCCTTGC     | pEC-XK99E-<br><i>cgl0833</i> and                 |
| <i>cgl0833</i> -R           | CCAAGCTTGCATGCCTGCAGTTAGTGATC<br>AACAGCCTTTTCAAC    | pEC-XK99E-<br><i>cgl0833</i> <sup>C1439T</sup>   |
| <i>cgl0833-gfp</i> -F1      | GAGCTCGGTACCCGGGGATCCATTATGAC<br>CGTTCTGACCTTCGT    | pK18- <i>cgl0833</i> -<br><i>gfp</i> and pK18-   |
| <i>cgl0833-gfp</i> -R1      | AGCTCCTCGCCCTTGCTCACGTGATCAAC<br>AGCCTTTTCAACA      | <i>cgl0833</i> <sup>C1439T</sup> -<br><i>gfp</i> |
| <i>cgl0833-gfp</i> -F2      | GTGAGCAAGGGCGAGGAGC                                 |                                                  |
| <i>cgl0833-gfp</i> -R2      | TTACTTGTACAGCTCGTCCATGC                             |                                                  |
| <i>cgl0833-gfp</i> -F3      | TGGACGAGCTGTACAAGTAAATCTAGTTT<br>CTGAAGTTATTTAAACCG |                                                  |
| <i>cgl0833-gfp</i> -R3      | CAGGTCGACTCTAGAGGATCCCCACCAT<br>TCCTGGAAACTC        |                                                  |
| <i>cgl0653</i> -21a-F       | AAGAAGGAGATATACATATGCCAAAGTAC<br>GACAATTCCAATG      | pET-21a-<br><i>cgl0653</i> and                   |
| <i>cgl0653</i> -21a-R       | TGGTGGTGGTGGTGGTCTCGAGGATTGCAGC<br>AAAGCCGCCT       | pET-21a-<br><i>cgl0653</i> <sup>G1256A</sup>     |
| $\Delta$ <i>cgl0653</i> -F1 | GAGCTCGGTACCCGGGGATCCGCCAATT<br>CATCACGAACCAT       | pK18- $\Delta$ <i>cgl0653</i>                    |
| $\Delta$ <i>cgl0653</i> -R1 | AATGGGTGGTGTACTTTGGCATTGAGG<br>TCCT                 |                                                  |
| $\Delta$ <i>cgl0653</i> -F2 | GCCAAAGTACACCACCCATTCACAGTCCG<br>A                  |                                                  |
| $\Delta$ <i>cgl0653</i> -R2 | CAGGTCGACTCTAGAGGATCCCGTTCTTTT<br>GGGCTTTGGTG       |                                                  |
| $\Delta$ <i>cgl0833</i> -F1 | GAGCTCGGTACCCGGGGATCCGAAGTGTG<br>TTCCATGCCCCA       | pK18- $\Delta$ <i>cgl0833</i>                    |
| $\Delta$ <i>cgl0833</i> -R1 | CACCGACACCCGTCTTGTGCAAGGAGAAT<br>AGTG               |                                                  |
| $\Delta$ <i>cgl0833</i> -F2 | GCACAAGACGGGTGTCGGTGTGAAAAG<br>GCT                  |                                                  |
| $\Delta$ <i>cgl0833</i> -R2 | CAGGTCGACTCTAGAGGATCCACTCCAAC<br>ACGGGAACAGGTACT    |                                                  |
| 16s-qF                      | ATAACTTGAGTGCTGTAGG                                 | qPCR                                             |
| 16s-qR                      | TTGGTGTTCTCCTGATA                                   |                                                  |
| <i>cgl0833</i> -qF          | ACATCCACGAGTTCAAGT                                  |                                                  |
| <i>cgl0833</i> -qR          | TCATACCGCCAAGAAGAA                                  |                                                  |

---

## Supplementary references

1. Zhang, Y. et al. A new genome-scale metabolic model of *Corynebacterium glutamicum* and its application. *Biotechnol. Biofuels* **10**, 169 (2017).
2. Tuyishime, P. et al. Engineering *Corynebacterium glutamicum* for methanol-dependent growth and glutamate production. *Metab. Eng.* **49**, 220–231 (2018).
3. Schäfer, A. et al. Small mobilizable multi-purpose cloning vectors derived from the *Escherichia coli* plasmids pK18 and pK19: selection of defined deletions in the chromosome of *Corynebacterium glutamicum*. *Gene* **145**, 69–73 (1994).
4. Kirchner, O. & Tauch, A. Tools for genetic engineering in the amino acid-producing bacterium *Corynebacterium glutamicum*. *J. Biotechnol.* **104**, 287–299 (2003).
5. Wang, Y. et al. MACBETH: multiplex automated *Corynebacterium glutamicum* base editing method. *Metab. Eng.* **47**, 200–210 (2018).
6. Wang, Y. et al. Expanding targeting scope, editing window, and base transition capability of base editing in *Corynebacterium glutamicum*. *Biotechnol. Bioeng.* **116**, 3016–3029 (2019).
