# Supplementary material
Source: PubMed Central journal article supplement (PMC7206135)
Supplement: 42003_2020_954_MOESM3_ESM.pdf [file 42003_2020_954_MOESM3_ESM.pdf]

## Description of Additional Supplementary Files

**File Name: Supplementary Data 1**

**Description:** Gene transcript level changes between *C. glutamicum* strain MX14 cultivated with 15 g/L vs. 4 g/L methanol Supplementary Data 1 is provided separately as an excel document
